# Supplementary material
Source: PubMed Central journal article supplement (PMC6111492)
Supplement: AJSLP-27-336-s005.pdf [file AJSLP-27-336-s005.pdf]

**Supplemental Material S5.** Motor speech and speech sample characteristics of participants who produced paraphasias.

| Participant | Variant | Motor speech diagnosis | Story length (seconds) | Number of words | Number of paraphasias | Proportion of paraphasias | Words per minute |
|-------------|---------|------------------------|------------------------|-----------------|-----------------------|---------------------------|------------------|
| Lv1         | LvPPA   | None                   | 195                    | 87              | 1                     | .01                       | 26.7             |
| Lv2         | LvPPA   | None                   | 212                    | 285             | 8                     | .02                       | 80.6             |
| Lv5         | LvPPA   | None                   | 358                    | 283             | 8                     | .02                       | 47.4             |
| Lv7         | LvPPA   | None                   | 236                    | 458             | 7                     | .01                       | 116.4            |
| Lv8         | LvPPA   | None                   | 265                    | 190             | 4                     | .02                       | 43               |
| NFv2        | NFvPPA  | AOS                    | 171                    | 185             | 7                     | .03                       | 64.9             |
| NFv3        | NFvPPA  | AOS/dysarthria         | 349                    | 350             | 1                     | .002                      | 60.1             |
| NFv4        | NFvPPA  | AOS                    | 185                    | 334             | 4                     | .01                       | 108.3            |
| NFv5        | NFvPPA  | AOS/dysarthria         | 270                    | 78              | 12                    | .15                       | 17.3             |
| NFv6        | NFvPPA  | AOS                    | 420                    | 174             | 7                     | .04                       | 24.8             |
| NFv7        | NFvPPA  | AOS/dysarthria         | 190                    | 229             | 7                     | .03                       | 72.3             |
| NFv8        | NFvPPA  | AOS/dysarthria         | 62                     | 57              | 3                     | .05                       | 55.1             |
| NFv9        | NFvPPA  | AOS/dysarthria         | 458                    | 402             | 12                    | .02                       | 52.6             |
| Sv1         | SvPPA   | None                   | 212                    | 181             | 7                     | .03                       | 51.2             |
| Sv2         | SvPPA   | None                   | 255                    | 365             | 2                     | .005                      | 85.8             |
| Sv5         | SvPPA   | None                   | 373                    | 429             | 6                     | .01                       | 69               |
| Sv7         | SvPPA   | None                   | 192                    | 125             | 1                     | .008                      | 39               |
| Sv8         | SvPPA   | None                   | 233                    | 349             | 5                     | .01                       | 89.8             |

*Note.* SvPPA = semantic variant primary progressive aphasia; LvPPA = logopenic variant primary progressive aphasia; NFvPPA = nonfluent, agrammatic variant primary progressive aphasia; AOS = apraxia of speech.
