# Supplementary material
Source: PubMed Central journal article supplement (PMC6111492)
Supplement: AJSLP-27-406-s001.pdf [file AJSLP-27-406-s001.pdf]

**Supplemental Material S1.** Western Aphasia Battery–Revised Aphasia Quotient (WAB-R-AQ) component scores and spontaneous speech fluency scores for all participants and by aphasia subtype.

| Descriptive statistic            | Broca’s<br>( <i>n</i> = 67) | Wernicke’s<br>( <i>n</i> = 21) | Conduction<br>( <i>n</i> = 47) | Anomic<br>( <i>n</i> = 85) | NABW<br>( <i>n</i> = 24) | All<br>( <i>n</i> = 258) |              |
|----------------------------------|-----------------------------|--------------------------------|--------------------------------|----------------------------|--------------------------|--------------------------|--------------|
| Spontaneous<br>Speech            | <i>M</i><br>( <i>SD</i> )   | 9.3<br>(3.1)                   | 12.3<br>(2.9)                  | 14.7<br>(2.2)              | 16.6<br>(2.2)            | 19.5<br>(0.6)            | 14<br>(4.2)  |
|                                  | Median                      | 11                             | 12.5                           | 15                         | 17.5                     | 20                       | 14           |
|                                  | Range                       | 0–13                           | 7–17                           | 8–19                       | 10–19                    | 18–20                    | 0–20         |
| Spontaneous<br>Speech: Fluency   | <i>M</i><br>( <i>SD</i> )   | 3.3<br>(1.1)                   | 6.5<br>(1.4)                   | 6.7<br>(1.4)               | 7.7<br>(1.6)             | 9.52<br>(0.6)            | 6.3<br>(2.5) |
|                                  | Median                      | 4                              | 6.5                            | 6                          | 8                        | 10                       | 6            |
|                                  | Range                       | 0–5                            | 5–9                            | 5–9                        | 5–10                     | 8–10                     | 0–10         |
| Auditory–Verbal<br>Comprehension | <i>M</i><br>( <i>SD</i> )   | 7.1<br>(1.5)                   | 5.9<br>(0.8)                   | 8.6<br>(0.9)               | 9.1<br>(0.9)             | 9.8<br>(0.3)             | 8.2<br>(1.6) |
|                                  | Median                      | 7.3                            | 6                              | 8.8                        | 9.2                      | 10                       | 8.6          |
|                                  | Range                       | 4.1–10                         | 4.4–6.9                        | 6.8–10                     | 6.6–10                   | 9.1–10                   | 3.1–10       |
| Repetition                       | <i>M</i><br>( <i>SD</i> )   | 4.5<br>(2.1)                   | 4.1<br>(2.2)                   | 5<br>(1.4)                 | 8.6<br>(0.8)             | 9.4<br>(0.6)             | 6.6<br>(2.6) |
|                                  | Median                      | 4.8                            | 3.9                            | 5.4                        | 8.8                      | 9.5                      | 7            |
|                                  | Range                       | 0–8.9                          | 0.2–7.4                        | 1.6–6.8                    | 7–10                     | 7.8–10                   | 0–10         |
| Naming                           | <i>M</i><br>( <i>SD</i> )   | 5.2<br>(2.3)                   | 4.3<br>(2.8)                   | 6.7<br>(2.2)               | 8<br>(1.6)               | 9.4<br>(0.4)             | 6.8<br>(2.5) |
|                                  | Median                      | 5.6                            | 4.1                            | 7                          | 8.4                      | 9.3                      | 7.6          |
|                                  | Range                       | 0–8.9                          | 0.2–8.3                        | 1.8–9.7                    | 0–9.9                    | 8.9–10                   | 0–10         |

Note. NABW = not aphasic by WAB.
